# Supplementary material
Source: PubMed Central journal article supplement (PMC2504809)
Supplement: 0804721105_0804721105SI.pdf [file 0804721105_0804721105SI.pdf]

# Supporting Information

Elfrink *et al.* 10.1073/pnas.0804721105

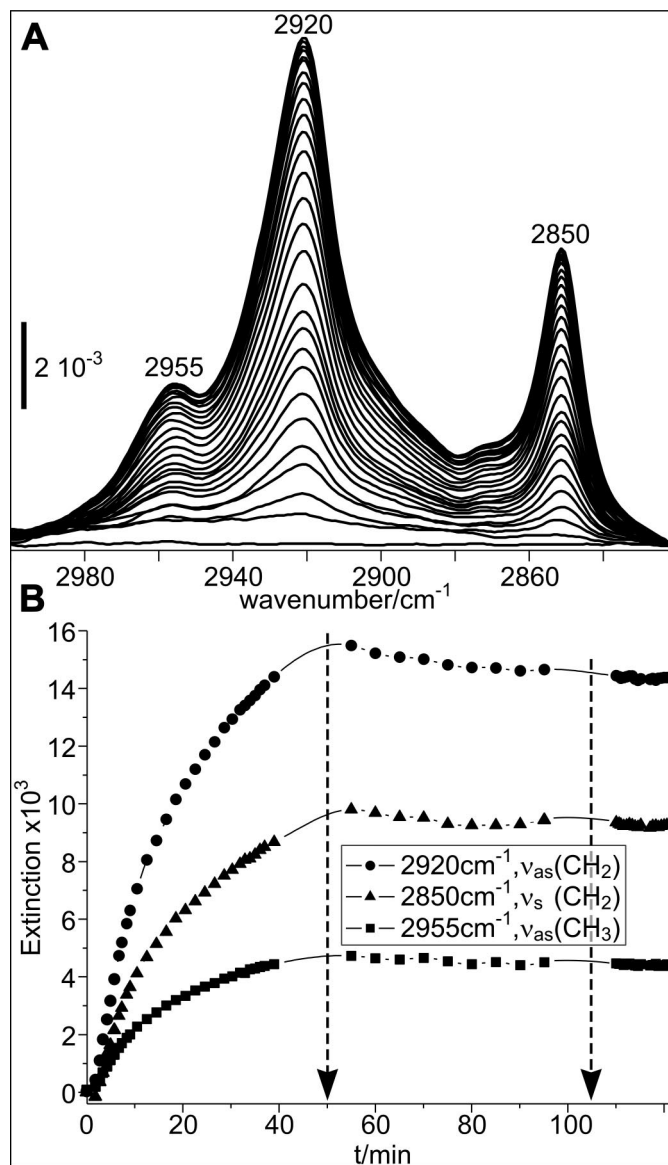

**Fig. S1.** Monitoring of lipid deposition onto an ATR crystal surface. The incubation of DMPC, sphingomyelin, cerebroside, and cholesterol 2:1:1:2 on the ATR crystal led to the formation of a stable, raft-like lipid membrane. The steady, shiftless growth of the bands indicative for C-H stretching vibrations excluded phase transitions (A) and yielded in saturation of the surface (B). After incubation with the lipid vesicle suspension, the setup was rinsed with pure buffer. Arrows indicate buffer exchanges. First, the lipid suspension was replaced by pure buffer. Second, washing removed detached and loosely bound lipids. The used method created a stable double lipid layer on the ATR crystal as a target for the anchoring experiments.
